# Supplementary material for: Task Analysis of In-Home SARS-CoV-2 Rapid Antigen Testing by Families
Source: Oxford University Press journal article supplement (doi:10.1542/peds.2022-056681), 2022-05-25
Supplement: peds_2022056681supplementarydata.pdf [file peds_2022056681supplementarydata.pdf]

## Supplemental Information

**SUPPLEMENTAL TABLE 2** Potential Solutions That Could be Implemented by Manufacturers or Clinicians Based on Our Findings

| Potential Failure Modes                                                                                  | Strategies Used By Families to Overcome Failure Mode                                                                                                                                                        | Manufacturers Could...                                                                                                                                                                                                       | Clinicians Could...                                                                                                                                     |
|----------------------------------------------------------------------------------------------------------|-------------------------------------------------------------------------------------------------------------------------------------------------------------------------------------------------------------|------------------------------------------------------------------------------------------------------------------------------------------------------------------------------------------------------------------------------|---------------------------------------------------------------------------------------------------------------------------------------------------------|
| A. Remember to conduct the test                                                                          | Plan to do test as part of a preestablished routine<br>Set alarm or reminder<br>Leave testing materials in line of sight (eg, on the kitchen table)                                                         | Provide guidance around establishing a testing regimen                                                                                                                                                                       | Coach families to pair the test with another routine<br>Coach families to place testing materials in a location to prompt their use                     |
| B. Remember in which order to do the steps of the test                                                   | Refer to instructions while conducting the test                                                                                                                                                             | Create simple numbered flowchart of test steps to correlate with redesigned numbered packaging                                                                                                                               |                                                                                                                                                         |
| C. Cannot locate testing materials                                                                       | Keep all materials in original box<br>Keep all materials in a designated location (eg, kitchen cabinet, desk drawer, supply drawer in child's room, etc)                                                    |                                                                                                                                                                                                                              | Coach families to pick one location to keep testing materials                                                                                           |
| D. Perforation on testing card package is small and hard to see/find                                     | Keep scissors with materials and use those to open testing card package                                                                                                                                     | Make perforation larger<br>Mark location of perforation                                                                                                                                                                      |                                                                                                                                                         |
| E. Child or pet knocks testing card off surface                                                          | Set up testing card in a carefully selected location (eg, out of the child's reach, on a high countertop, within eyesight, etc)                                                                             |                                                                                                                                                                                                                              | Make families aware of this challenge and share helpful strategies                                                                                      |
| F. Cannot tell if there were 6 drops administered                                                        |                                                                                                                                                                                                             | Design test card to only hold correct amount of reagent<br>Supply only the amount of reagent needed<br>Provide guidance on the test's tolerance for fewer than or more than 6 drops                                          |                                                                                                                                                         |
| G. Cannot remember how many drops to use                                                                 | Write "6" on the bottle to cue use of 6 drops                                                                                                                                                               | Make guidance on card more pronounced<br>Design test card to only hold correct amount of reagent<br>Supply only the amount of reagent needed<br>Provide guidance on the test's tolerance for fewer than or more than 6 drops |                                                                                                                                                         |
| H. Cannot tell which end is the swab end versus the handle end when opening, potential for contamination |                                                                                                                                                                                                             | Improve labeling of swab to clearly locate end for opening                                                                                                                                                                   |                                                                                                                                                         |
| I. Child does not like swabbing                                                                          | Do swab while child is sleeping<br><br>Explain testing steps to the child verbally<br>Have child do swab themselves (while coaching them, eg, "swirl it like you're swirling your French fries in ketchup") |                                                                                                                                                                                                                              | Coach families through possible challenges of and strategies for collecting the sample and advise on any strategies that may influence test performance |

**SUPPLEMENTAL TABLE 2** Continued

| Potential Failure Modes                                               | Strategies Used By Families to Overcome Failure Mode                                                                                                                                                                                                                                                                                                                                                                  | Manufacturers Could...                                                                                                                                 | Clinicians Could ...                                                                                  |
|-----------------------------------------------------------------------|-----------------------------------------------------------------------------------------------------------------------------------------------------------------------------------------------------------------------------------------------------------------------------------------------------------------------------------------------------------------------------------------------------------------------|--------------------------------------------------------------------------------------------------------------------------------------------------------|-------------------------------------------------------------------------------------------------------|
|                                                                       | Keep child in a comfortable/<br>distracting setting (eg,<br>watching TV, counting, singing,<br>etc)<br>Have child in a chair that<br>supports child's head and neck<br>to prevent bucking<br>Ask child which nostril to swab<br>first<br>Have another caregiver help<br>restrain the child during<br>swabbing<br>Model test swabbing on oneself<br>first<br>Distinguish the test explicitly from<br>a deep nasal swab |                                                                                                                                                        |                                                                                                       |
| J. Fear of not getting enough sample                                  | Do more circles in each nostril<br>Observe swab to see if it looks<br>wet                                                                                                                                                                                                                                                                                                                                             | Design swab to indicate when<br>sufficient sample is collected                                                                                         | Coach families on what an<br>adequate sample is, especially<br>with regards to swabbing the<br>child, |
| K. Sticker can be hard to peel off                                    | Peel sticker tab off before<br>swabbing (so that both hands<br>are free)                                                                                                                                                                                                                                                                                                                                              | Create tab to make sticker easier<br>to peel off                                                                                                       |                                                                                                       |
| L. Remember to go back to read results after 15 min and before 30 min | Set timer (eg, using smart home<br>system, stand-alone timer, or<br>phone)<br>Sit and wait 15 min in front of the<br>card<br>Place the test card in a location<br>to cue reading it in 15 min (eg,<br>next to them at their desk)<br>Write time of test administration<br>onto the testing card<br>Read results before 15 min pass                                                                                    | Share strategies for remembering<br>to go back to test                                                                                                 | Share strategies for<br>remembering to go back to<br>test                                             |
| M. Confuse testing cards (if conducting test on >1 person)            | Write name on the testing card                                                                                                                                                                                                                                                                                                                                                                                        | Create specific locations for<br>recording: name, date, and time<br>sample was taken, and add<br>filling these in as a step for<br>conducting the test |                                                                                                       |
| N. Read the lines because of poor vision                              | Use zoom feature on phone<br>camera to observe results                                                                                                                                                                                                                                                                                                                                                                | Provide multiple images of<br>positive test results to show<br>range of what they look like                                                            |                                                                                                       |
| O. Remember to record the results                                     | Record test date and details while<br>waiting and place the recording<br>sheet next to the test card to<br>cue recording results                                                                                                                                                                                                                                                                                      | Provide guidance on what to do if<br>the test result is positive                                                                                       | Provide guidance on what to do<br>if the test result is positive                                      |
